# Supplementary material
Source: HighWire-hosted journal article supplement (https://bmjopen.bmj.com/content/7/5/e015308)
Supplement: inline-supplementary-material-2 [file inline-supplementary-material-2.docx]

**COREQ 32-point Checklist for Reporting Qualitative Research**

|  | **Item** | **Guide questions/description** | **Reported?** | **Page, Section** |
| --- | --- | --- | --- | --- |
| **Domain 1: Research team and reflexivity** |  |  |  |  |
| Personal Characteristics |  |  |  |  |
| 1 | Interviewer/facilitator | Which author/s conducted the interview or focus group? | Yes | Page 8, paragraph 2 |
| 2 | Credentials | What were the researcher's credentials? *E.g. PhD, MD* | Yes | Title page |
| 3 | Occupation | What was their occupation at the time of the study? | Yes | Page 8, paragraph 2 |
| 4 | Gender | Was the researcher male or female? | Yes | Page 8, paragraph 2 |
| 5 | Experience and training | What experience or training did the researcher have? | Yes | Page 8, paragraph 2 |
| Relationship with participants |  |  |  |  |
| 6 | Relationship established | Was a relationship established prior to study commencement? | Yes | Page 8, paragraph 2 |
| 7 | Participant knowledge of the interviewer | What did the participants know about the researcher? e*.g. personal goals, reasons for doing the research* | Yes | Page 8, paragraph 2 |
| 8 | Interviewer characteristics | What characteristics were reported about the interviewer/facilitator? e.g. *Bias, assumptions, reasons and interests in the research topic* | Yes | Page 6, paragraph 2, page 8, paragraph 2 |
| **Domain 2: study design** |  |  |  |  |
| Theoretical framework |  |  |  |  |
| 9 | Methodological orientation and Theory | What methodological orientation was stated to underpin the study? *e.g. grounded theory, discourse analysis, ethnography, phenomenology, content analysis* | Yes | Page 7, paragraph 1 |
| Participant selection |  |  |  |  |
| 10 | Sampling | How were participants selected? *e.g. purposive, convenience, consecutive, snowball* | Yes | Page 7, paragraph 2 |
| 11 | Method of approach | How were participants approached? e*.g. face-to-face, telephone, mail, email* | Yes | Page 7, paragraph 2 |
| 12 | Sample size | How many participants were in the study? | Yes | Page 10, paragraph 2 |
| 13 | Non-participation | How many people refused to participate or dropped out? Reasons? | Yes | Page 8, paragraph 1 |
| Setting |  |  |  |  |
| 14 | Setting of data collection | Where was the data collected? e*.g. home, clinic, workplace* | Yes | Page 8, paragraph 2 |
| 15 | Presence of non-participants | Was anyone else present besides the participants and researchers? | Yes | Page 8, paragraph 2 |
| 16 | Description of sample | What are the important characteristics of the sample? *e.g. demographic data, date* | Yes | Page 10, paragraph 2, table 2 |
| Data collection |  |  |  |  |
| 17 | Interview guide | Were questions, prompts, guides provided by the authors? Was it pilot tested? | Yes | Page 8, paragraph 2, table 1 |
| 18 | Repeat interviews | Were repeat interviews carried out? If yes, how many? | Yes | Page 9, paragraph 1 |
| 19 | Audio/visual recording | Did the research use audio or visual recording to collect the data? | Yes | Page 9, paragraph 1 |
| 20 | Field notes | Were field notes made during and/or after the interview or focus group? | Yes | Page 9, paragraph 1 |
| 21 | Duration | What was the duration of the interviews or focus group? | Yes | Page 9, paragraph 1 |
| 22 | Data saturation | Was data saturation discussed? | Yes | Page 9, paragraph 1 |
| 23 | Transcripts returned | Were transcripts returned to participants for comment and/or correction? | Yes | Page 9, paragraph 1 |
| **Domain 3: analysis and findings** |  |  |  |  |
| Data analysis |  |  |  |  |
| 24 | Number of data coders | How many data coders coded the data? | Yes | Page 9, paragraph 2 |
| 25 | Description of the coding tree | Did authors provide a description of the coding tree? | Yes | Page 9, paragraph 2 |
| 26 | Derivation of themes | Were themes identified in advance or derived from the data? | Yes | Page 9, paragraph 2 |
| 27 | Software | What software, if applicable, was used to manage the data? | Yes | Page 9, paragraph 2 |
| 28 | Participant checking | Did participants provide feedback on the findings? | No | Participants did not provide feedback on the findings |
| Reporting |  |  |  |  |
| 29 | Quotations presented | Were participant quotations presented to illustrate the themes / findings? Was each quotation identified? e*.g. participant number* | Yes | Page 11 - 16 |
| 30 | Data and findings consistent | Was there consistency between the data presented and the findings? | Yes | Page 11 - 16 |
| 31 | Clarity of major themes | Were major themes clearly presented in the findings? | Yes | Page 11 - 16 |
| 32 | Clarity of minor themes | Is there a description of diverse cases or discussion of minor themes? | Yes | Page 11 - 16 |

Allison Tong, Peter Sainsbury, Jonathan Craig. Consolidated criteria for reporting qualitative research (COREQ): a 32-item checklist for interviews and focus groups. *International Journal for Quality in Health Care.* Dec 2007, 19 (6) 349-357; DOI: 10.1093/intqhc/mzm042
